# Supplementary material
Source: publisher figshare collection journal article supplement (https://acs.figshare.com/ndownloader/files/28965594)
Supplement: Supplementary file 1 [file 28965594]

The Supporting Information is available free of charge at  
<https://pubs.acs.org/doi/xxx>

Detailed description of materials and methods including sample preparation and data processing, and gradient elution conditions for the LC-MS analysis (Table S1); peak assignment for Figure 1b (Table S2); elemental compositions calculated by the result from the FT-ICR measurement (Table S3); relative abundances for the O<sub>x</sub> class compounds of the LC fractions SW II, SW III, and SW IV (Figure S1); in-cell CID fragmentation spectrum of the precursor ion at *m/z* 267.0544 (C<sub>9</sub>H<sub>15</sub>O<sub>7</sub>S<sup>-</sup>, top) and the precursor ion at *m/z* 281.0701 (C<sub>10</sub>H<sub>17</sub>O<sub>7</sub>S<sup>-</sup>, bottom), with the proposed molecular structure and annotation of fragment ions (Figure S2) (PDF)

# Supporting Information

## Online Liquid Chromatography and FT-ICR MS Enables Advanced Separation and Profiling of Organosulfates in Dissolved Organic Matter

*Yulin Qi<sup>1,2</sup>, Chao Ma<sup>1</sup>, Shuang Chen<sup>1</sup>, Jinfeng Ge<sup>1</sup>, Qiaozhuan Hu<sup>1</sup>, Si-Liang Li<sup>1</sup>,  
Dietrich A. Volmer<sup>3</sup>, Pingqing Fu<sup>1,2,\*</sup>*

<sup>1</sup> Institute of Surface-Earth System Science, School of Earth System Science, Tianjin University, Tianjin 300072, China

<sup>2</sup> Tianjin Key Laboratory of Earth Critical Zone Science and Sustainable Development in Bohai Rim, Tianjin University, Tianjin 300072, China

<sup>3</sup> Department of Chemistry, Humboldt-Universität zu Berlin, Berlin 12489, Germany

\*Corresponding author: Pingqing Fu (fupingqing@tju.edu.cn)

## Materials and Methods

### Sample Preparation

The surface water (SW) sample was collected from the mainstream of the Yongding River, China, and dissolved NOM was collected using the solid-phase extraction (SPE) protocol described by Dittmar et al.<sup>[1]</sup> Briefly, Agilent Bond Elut PPL (1 g) cartridges were conditioned with methanol followed by ultrapure water (pH 2). Roughly 1 L of sample was loaded onto the cartridge followed by another rinse with ultrapure water (pH 2). The cartridges were then dried under a stream of N<sub>2</sub> gas followed by elution of NOM in 10 mL of methanol and stored at −20 °C until further analysis.

The rainwater (RW) sample was collected from urban areas of Shanghai. Rainwater was filtered through pre-combusted glass fibre filters (Whatman GFF), then extracted using Waters Oasis HLB (500 mg) cartridges on a Visiprep SPE Vacuum Manifold (Supelco Analytical, USA). The cartridges were preconditioned with methanol and Millipore Q water. The samples were percolated through the cartridges via PTFE tubes. The cartridges were then washed with 5 mL Millipore Q water and dried under a stream of N<sub>2</sub> gas for 1 h, followed by elution of NOM in 6 mL of methanol and stored at −20 °C until further analysis.

HPLC-grade methanol, acetonitrile and ACS-reagent-grade formic acid were purchased from Sigma-Aldrich. For direct-infusion (DI) MS measurement, samples were dissolved in a water/ acetonitrile (50/50, v/v) mixture at a concentration of 50 DI-MS and 200 ppm for LC-MS, respectively.

### Data Processing

The acquired datasets were analyzed using a combination of DataAnalysis 5.0 (Bruker) and Composer 1.5.6 (Sierra Analytics) software. The full scan mass spectra were internally calibrated using a series of homologous compounds throughout the  $m/z$  range. Elemental formulae were assigned to the peaks inside the calibrated  $m/z$  range,

and only peaks with S/N >6 were extracted for DOM formula assignment with the following tolerances: composition was restricted to  $^{12}\text{C}$ (1-50),  $^1\text{H}$ (1-100),  $^{16}\text{O}$ (0-30),  $^{32}\text{S}$ (0-2),  $^{14}\text{N}$ (0-3) and  $^{31}\text{P}$ (0-1); double bond equivalence (DBE) up to 30;  $0.3 \leq \text{H/C} \leq 2.5$ ,  $\text{O/C} \leq 1.2$  and  $\text{N/C} \leq 0.5$ ;  $-10 \leq \text{DBE-O} \leq 10$ ; the acceptable mass error was set to  $\pm 0.5$  ppm for singly-charged ions.<sup>[2,3]</sup> False positive molecular formulas introduced by procedural blanks were excluded from the final mass list.

**Table S1.** Gradient elution conditions for the LC-MS analysis of the DOM samples

| <b>Retention<br/>(min)</b> | <b>Flow<br/>(ml/min)</b> | <b>A%<br/>(H<sub>2</sub>O)</b> | <b>B%<br/>(ACN)</b> |
|----------------------------|--------------------------|--------------------------------|---------------------|
| <b>0</b>                   | 0.1                      | 95                             | 5                   |
| <b>5</b>                   | 0.1                      | 95                             | 5                   |
| <b>11</b>                  | 0.1                      | 10                             | 90                  |
| <b>25</b>                  | 0.1                      | 10                             | 90                  |
| <b>28</b>                  | 0.1                      | 95                             | 5                   |
| <b>30</b>                  | 0.1                      | 95                             | 5                   |

**Table S2.** Peak assignment for Figure 1b (right).

| <b>No.</b> | <b>Compound</b>         | <b>Exp. <math>m/z</math></b> | <b>Calc. <math>m/z</math></b> | <b>ppm Error</b> |
|------------|-------------------------|------------------------------|-------------------------------|------------------|
| <b>1</b>   | $C_{15}H_{10}O_{11}$    | 365.01501                    | 365.01504                     | 0.07             |
| <b>2</b>   | $C_{19}H_{10}O_8$       | 365.03028                    | 365.03029                     | 0.03             |
| <b>3</b>   | $C_{16}H_{14}O_{10}$    | 365.05146                    | 365.05142                     | -0.11            |
| <b>4</b>   | $C_{15}H_{14}N_2O_9$    | 365.06268                    | 365.06265                     | -0.07            |
| <b>5</b>   | $C_{20}H_{14}O_7$       | 365.06672                    | 365.06668                     | -0.12            |
| <b>6</b>   | $C_{17}H_{18}O_9$       | 365.08783                    | 365.08781                     | -0.07            |
| <b>7</b>   | $C_{16}H_{18}N_2O_8$    | 365.09906                    | 365.09904                     | -0.06            |
| <b>8</b>   | $C_{21}H_{18}O_6$       | 365.10305                    | 365.10306                     | 0.03             |
| <b>9</b>   | $C_{18}H_{22}O_8$       | 365.12421                    | 365.12419                     | -0.05            |
| <b>10</b>  | $C_{17}H_{22}N_2O_7$    | 365.13541                    | 365.13543                     | 0.04             |
| <b>11</b>  | $C_{19}H_{26}O_7$       | 365.16060                    | 365.16058                     | -0.06            |
| <b>12</b>  | $C_{20}H_{30}O_6$       | 365.19694                    | 365.19696                     | 0.06             |
| <b>13</b>  | $C_{21}H_{34}O_5$       | 365.23332                    | 365.23335                     | 0.08             |
| <b>14</b>  | $C_{15}H_{10}O_7S_2$    | 364.97934                    | 364.97952                     | 0.49             |
| <b>15</b>  | $C_{15}H_{10}O_9S$      | 364.99726                    | 364.99728                     | 0.04             |
| <b>16</b>  | $C_{14}H_{10}N_2O_8S$   | 365.00849                    | 365.00851                     | 0.05             |
| <b>17</b>  | $C_{12}H_{14}O_{11}S$   | 365.01840                    | 365.01841                     | 0.02             |
| <b>18</b>  | $C_{16}H_{14}O_8S$      | 365.03362                    | 365.03366                     | 0.12             |
| <b>19</b>  | $C_{13}H_{18}O_8S_2$    | 365.03698                    | 365.03703                     | 0.14             |
| <b>20</b>  | $C_{15}H_{14}N_2O_7S$   | 365.04488                    | 365.04490                     | 0.04             |
| <b>21</b>  | $C_{13}H_{18}O_{10}S$   | 365.05479                    | 365.05479                     | 0.00             |
| <b>22</b>  | $C_{17}H_{18}O_7S$      | 365.07001                    | 365.07005                     | 0.10             |
| <b>23</b>  | $C_{14}H_{22}O_7S_2$    | 365.07347                    | 365.07342                     | -0.14            |
| <b>24</b>  | $C_{13}H_{22}N_2O_6S_2$ | 365.08458                    | 365.08465                     | 0.19             |
| <b>25</b>  | $C_{14}H_{22}O_9S$      | 365.09117                    | 365.09118                     | 0.02             |
| <b>26</b>  | $C_{18}H_{22}O_6S$      | 365.10638                    | 365.10643                     | 0.15             |
| <b>27</b>  | $C_{15}H_{26}O_8S$      | 365.12754                    | 365.12756                     | 0.06             |
| <b>28</b>  | $C_{19}H_{26}O_5S$      | 365.14280                    | 365.14282                     | 0.05             |
| <b>29</b>  | $C_{16}H_{30}O_7S$      | 365.16392                    | 365.16395                     | 0.08             |
| <b>30</b>  | $C_{17}H_{34}O_6S$      | 365.20034                    | 365.20033                     | -0.02            |
| <b>31</b>  | $C_{18}H_{38}O_5S$      | 365.23672                    | 365.23672                     | 0.00             |

**Table S3.** Elemental compositions calculated by the result from the FT-ICR measurement. The values are weight averaged based on peak magnitude.

|            | <b>C%</b> | <b>O%</b> | <b>S%</b> | <b>N%</b> |
|------------|-----------|-----------|-----------|-----------|
| <b>DI</b>  | 57.89     | 32.76     | 1.64      | 1.51      |
| <b>SW2</b> | 57.19     | 34.87     | 0.46      | 1.45      |
| <b>SW3</b> | 53.39     | 32.75     | 6.74      | 1.32      |
| <b>SW4</b> | 62.55     | 28.89     | 1.02      | 0.71      |

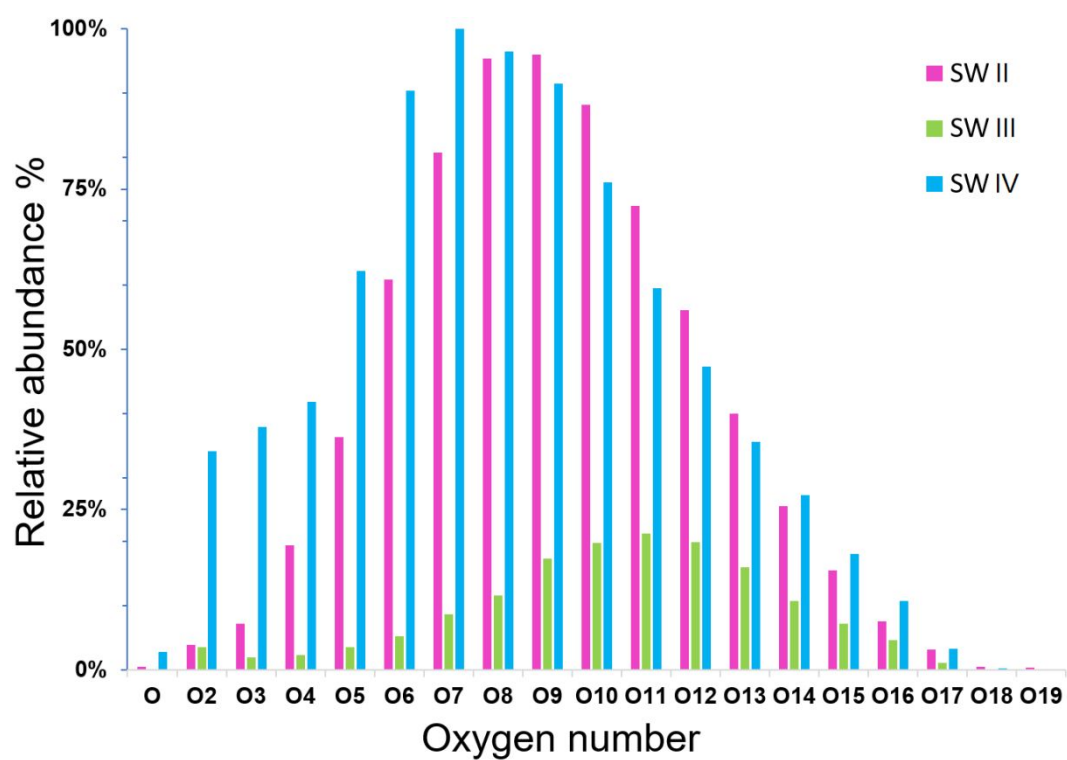

**Figure S1.** Relative abundances for the Ox class compounds of the LC fractions SW II, SW III, and SW IV



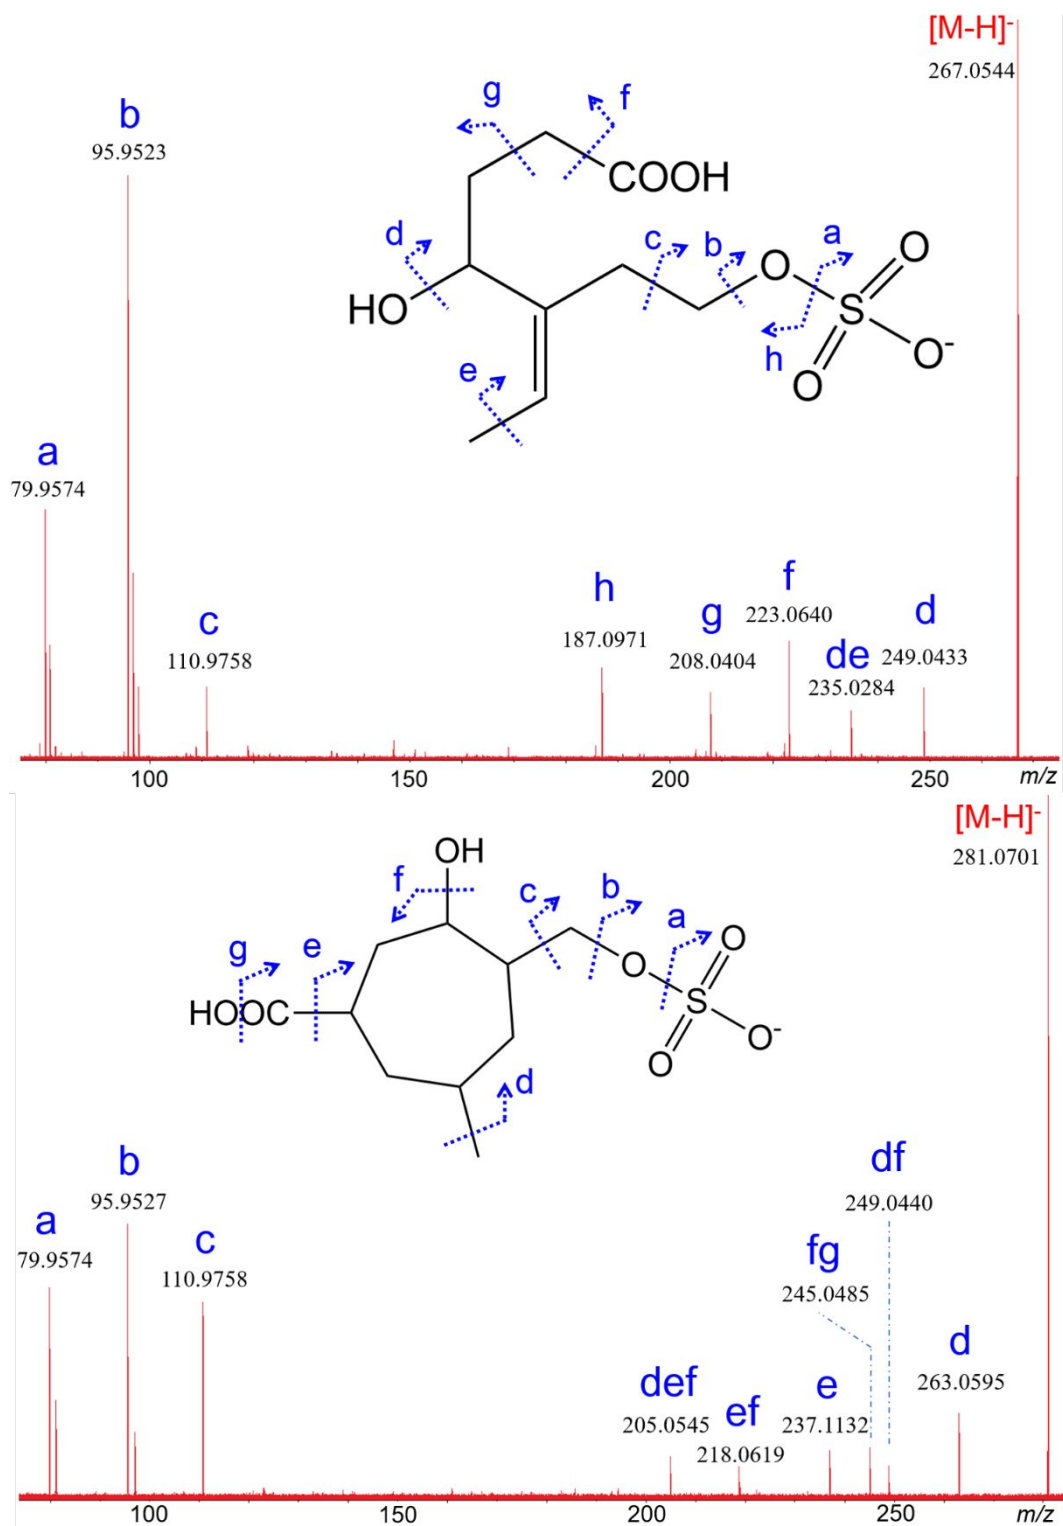

**Figure S2.** In-cell CID fragmentation spectrum of the precursor ion at  $m/z$  267.0544 ( $C_9H_{15}O_7S^-$ , top) and the precursor ion at  $m/z$  281.0701 ( $C_{10}H_{17}O_7S^-$ , bottom), with the proposed molecular structure and annotation of fragment ions.

## References

- (1) Dittmar, T.; Koch, B.; Hertkorn, N.; Kattner, G. A Simple and Efficient Method for the Solid-Phase Extraction of Dissolved Organic Matter (SPE-DOM) from Seawater. *Limnol. Oceanogr. Methods* **2008**, 6 (6), 230–235.
- (2) Koch, B. P.; Dittmar, T.; Witt, M.; Kattner, G. Fundamentals of Molecular Formula Assignment to Ultrahigh Resolution Mass Data of Natural Organic Matter. *Anal. Chem.* **2007**, 79 (4), 1758–1763.
- (3) Herzprung, P.; Hertkorn, N.; von Tümpeling, W.; Harir, M.; Friese, K.; Schmitt-Kopplin, P. Understanding Molecular Formula Assignment of Fourier Transform Ion Cyclotron Resonance Mass Spectrometry Data of Natural Organic Matter from a Chemical Point of View. *Anal. Bioanal. Chem.* **2014**, 406 (30), 7977–7987.
